# Supplementary material
Source: PubMed Central journal article supplement (PMC3336194)
Supplement: NIHMS368523-supplement-Appendix.pdf [file NIHMS368523-supplement-Appendix.pdf]

## Technical Appendix

### Risk-Adjusted Readmission Rates and Risk-Adjusted Mortality Rates:

We examined every hospitalization with the primary discharge diagnosis of heart failure (HF) (ICD-9 codes 398.91, 404.x1, 404.x3, 428.0 to 428.9) in which the patient was discharged prior to December 1 (to ensure that all patients had at least 30 days to be readmitted). We then analyzed all-cause readmissions within 30 days of discharge and all-cause mortality within 30 days of admission using the Elixhauser adjustment scheme, where the likelihood of readmission or death was adjusted for patient characteristics including age, gender, race, and the presence or absence of up to 29 co-morbidities. The Elixhauser adjustment was developed for mortality and is widely accepted for its good predictive validity.(16-18)

However, to evaluate its validity for readmissions, we proceeded with additional analysis. We presumed that age and the presence of a wide range of comorbid conditions are also likely to be factors associated with a higher risk of readmission. We built our risk-adjusted models for readmission rates for HF patients in a logistic regression model as follows:

$$y = \alpha + \beta_1 \text{ age} + \beta_2 \text{ gender} + \beta_3 \text{ race} + \beta_4 \text{ Comorb1} + \dots + \beta_{32} e_i$$

where  $y$  is the log-odds of being readmitted within 30 days (yes or no),  $\alpha$  is the intercept, and the  $\beta$ etas are the coefficients of each of the variables in the model. The  $\beta$ eta coefficients are shown below in Table 1. We calculated rates of readmission for each hospital.

We found that the Elixhauser scheme had very good predictive ability for readmission: we categorized all patients into deciles by their predicted likelihood of readmission and found a clear and consistent relationship between the predicted and observed readmission rate. For example, among HF patients, the observed readmission rates ranged from 13.2% (in the lowest predicted decile) to 52.0% (highest predicted decile), increasing in a monotonic fashion across the ten groups.

There is no consistent and validated alternative approach to risk-adjustment of readmissions(40) although Krumholz and colleagues did develop a Bayesian approach that is currently being used for public reporting.(3) However, it dramatically shrinks variation, especially for smaller hospitals, leading to much greater homogeneity among all hospitals.(3) Our approach, which has a C-statistic of 0.60, and yet, retains much of the natural variation that exists within the data, compares favorably with the Krumholz approach, which has a c-statistic of 0.61.

Appendix Table 1: Description of Heart Failure Model Coefficients

| Coefficient Description                         | HQA $\beta$ , (SE) | HCAHPS $\beta$ , (SE) |
|-------------------------------------------------|--------------------|-----------------------|
| Intercept                                       | -1.43 (0.12)       | -1.37 (0.12)          |
| Age                                             | 0.00 (0.0)         | 0.00 (0.0)            |
| White                                           | 0.04 (0.09)        | 0.05 (0.09)           |
| Black                                           | 0.08 (0.10)        | 0.08 (0.10)           |
| Others                                          | -0.02 (0.11)       | -0.02 (0.11)          |
| Asian                                           | 0.02 (0.11)        | 0.00 (0.11)           |
| Hispanic                                        | 0.13 (0.10)        | 0.12 (0.10)           |
| Native American                                 | 0.11 (0.12)        | 0.12 (0.12)           |
| Male                                            | -0.03 (0.01)       | -0.03 (0.01)          |
| Congestive Heart Failure                        | 1.15 (0.01)        | 1.15 (0.01)           |
| Valvular Disease                                | 0.06 (0.02)        | 0.06 (0.02)           |
| Pulmonary Circulation Disease                   | -0.19 (0.03)       | -0.19 (0.03)          |
| Peripheral Vascular Disease                     | 0.01 (0.02)        | 0.01 (0.02)           |
| Paralysis                                       | 0.18 (0.04)        | 0.18 (0.04)           |
| Other Neurological Disorders                    | 0.03 (0.02)        | 0.03 (0.02)           |
| Chronic Pulmonary Disease                       | 0.08 (0.01)        | 0.08 (0.01)           |
| Diabetes without Chronic Complications          | -0.01 (0.01)       | -0.01 (0.01)          |
| Diabetes with Chronic Complications             | 0.01 (0.02)        | 0.01 (0.02)           |
| Hypothyroidism                                  | -0.08 (0.02)       | -0.08 (0.02)          |
| Renal Failure                                   | 0.57 (0.02)        | 0.57 (0.02)           |
| Liver Disease                                   | 0.14 (0.05)        | 0.14 (0.05)           |
| Lymphoma                                        | 0.11 (0.05)        | 0.11 (0.05)           |
| Metastatic cancer                               | 0.16 (0.04)        | 0.16 (0.04)           |
| Solid Tumor without Metastasis                  | 0.05 (0.03)        | 0.05 (0.03)           |
| Rheumatoid Arthritis/ Collagen Vascular Disease | -0.14 (0.04)       | -0.14 (0.04)          |
| Coagulopathy                                    | 0.16 (0.03)        | 0.16 (0.03)           |
| Obesity                                         | -0.28 (0.03)       | -0.28 (0.03)          |
| Weight loss                                     | 0.31 (0.03)        | 0.31 (0.03)           |
| Fluid and Electrolyte Disorders                 | 0.25 (0.01)        | 0.25 (0.01)           |
| Chronic Blood Loss, Anemia                      | 0.14 (0.04)        | 0.14 (0.04)           |
| Deficiency Anemias                              | -0.02 (0.01)       | -0.02 (0.01)          |
| Alcohol Abuse                                   | -0.24 (0.06)       | -0.25 (0.06)          |
| Drug Abuse                                      | 0.31 (0.12)        | 0.31 (0.12)           |
| Psychoses                                       | 0.22 (0.04)        | 0.22 (0.04)           |
| Depression                                      | 0.03 (0.03)        | 0.03 (0.03)           |
| Hypertension                                    | -0.30 (0.01)       | -0.30 (0.01)          |
| Highest discharge quartile                      | 0.03 (0.02)        | -0.11 (0.02)          |
| Second highest discharge quartile               | 0.00 (0.02)        | -0.08 (0.02)          |
| Third highest discharge quartile                | -0.02 (0.02)       | -0.05 (0.02)          |
| New England hospital location                   | 0.18 (0.02)        | 0.19 (0.02)           |
| Midwest hospital location                       | 0.13 (0.02)        | 0.15 (0.02)           |
| South hospital location                         | 0.11 (0.02)        | 0.11 (0.02)           |
| 6-99 hospital beds                              | -0.04 (0.03)       | -0.02 (0.03)          |
| 100-399 hospital beds                           | 0.02 (0.02)        | 0.02 (0.02)           |
| Presence of MCU                                 | -0.03 (0.02)       | -0.03 (0.02)          |
| Teaching hospital                               | 0.02 (0.02)        | 0.03 (0.02)           |
| Urban hospital                                  | -0.14 (0.04)       | -0.14 (0.04)          |
| For-profit hospital                             | 0.05 (0.03)        | 0.03 (0.03)           |
| Non-profit, non-government                      | -0.03 (0.02)       | -0.03 (0.02)          |

$\beta$  is the parameter estimate. SE is the Standard Error.

Appendix Table 2: The relationship between case volume and processes and outcomes of care, stratified by volume group

Appendix Table 2a: The relationship between case volume and processes of care for heart failure, stratified by volume group (spline knots at 100 and 400 discharges in 2006-2007)

| Volume group                                                                        | Unadjusted analysis                 |        |      |        | Adjusted for hospital characteristics |        |      |        | Adjusted for hospital characteristics, hospital size |        |      |        |
|-------------------------------------------------------------------------------------|-------------------------------------|--------|------|--------|---------------------------------------|--------|------|--------|------------------------------------------------------|--------|------|--------|
|                                                                                     | Change per 10 pt increase in volume | P      | Mean | P      | Change per 10 pt increase in volume   | P      | Mean | P      | Change per 10 pt increase in volume                  | P      | Mean | P      |
| <u>Overall Score</u>                                                                |                                     |        |      |        |                                       |        |      |        |                                                      |        |      |        |
| Low                                                                                 | 1.27 (0.90, 1.63)                   | <0.001 | 75.9 | <0.001 | 1.13 (0.78, 1.49)                     | <0.001 | 78.7 | <0.001 | 1.13 (0.77, 1.49)                                    | <0.001 | 78.9 | <0.001 |
| Medium                                                                              | 0.30 (0.25, 0.34)                   | <0.001 | 85.1 | <0.001 | 0.17 (0.13, 0.22)                     | <0.001 | 85.5 | 0.007  | 0.16 (0.11, 0.21)                                    | <0.001 | 85.6 | 0.09   |
| High                                                                                | -0.02 (-0.04, 0.004)                | 0.11   | 89.1 | Ref    | -0.03 (-0.05, -0.008)                 | 0.007  | 86.9 | Ref    | -0.04 (-0.07, -0.02)                                 | 0.001  | 86.6 | Ref    |
| <u>ACE inhibitor or ARB for patients with left ventricular systolic dysfunction</u> |                                     |        |      |        |                                       |        |      |        |                                                      |        |      |        |
| Low                                                                                 | -0.68 (-1.13, -0.23)                | 0.003  | 91.1 | 0.27   | -0.39 (-0.84, 0.05)                   | 0.08   | 90.6 | 0.31   | -0.39 (-0.83, 0.05)                                  | 0.09   | 90.6 | 0.34   |
| Medium                                                                              | 0.05 (0.003, 0.09)                  | 0.04   | 88.9 | 0.001  | 0.02 (-0.03, 0.06)                    | 0.45   | 89.3 | 0.49   | 0.01 (-0.04, 0.06)                                   | 0.68   | 89.3 | 0.50   |
| High                                                                                | 0.002 (-0.01, 0.02)                 | 0.77   | 90.1 | Ref    | -0.01 (-0.02, 0.001)                  | 0.08   | 89.6 | Ref    | -0.02 (-0.04, -0.002)                                | 0.03   | 89.6 | Ref    |
| <u>Assessment of left ventricular function</u>                                      |                                     |        |      |        |                                       |        |      |        |                                                      |        |      |        |
| Low                                                                                 | 1.14 (0.78, 1.49)                   | <0.001 | 81.8 | <0.001 | 1.10 (0.76, 1.44)                     | <0.001 | 85.1 | <0.001 | 1.10 (0.76, 1.44)                                    | <0.001 | 85.5 | <0.001 |
| Medium                                                                              | 0.34 (0.30, 0.38)                   | <0.001 | 91.3 | <0.001 | 0.19 (0.14, 0.23)                     | <0.001 | 91.8 | <0.001 | 0.16 (0.12, 0.21)                                    | <0.001 | 92.0 | 0.03   |
| High                                                                                | -0.004 (-0.02, 0.02)                | 0.70   | 96.3 | Ref    | -0.01 (-0.03, 0.007)                  | 0.21   | 93.8 | Ref    | -0.03 (-0.06, -0.007)                                | 0.01   | 93.2 | Ref    |
| <u>Discharge instructions</u>                                                       |                                     |        |      |        |                                       |        |      |        |                                                      |        |      |        |
| Low                                                                                 | 1.11 (0.41, 1.81)                   | 0.002  | 65.8 | <0.001 | 0.87 (0.16, 1.58)                     | 0.02   | 68.1 | <0.001 | 0.87 (0.16, 1.58)                                    | 0.02   | 68.0 | <0.001 |
| Medium                                                                              | 0.27 (0.20, 0.33)                   | <0.001 | 75.1 | <0.001 | 0.19 (0.11, 0.27)                     | <0.001 | 75.5 | 0.20   | 0.19 (0.11, 0.27)                                    | <0.001 | 75.4 | 0.17   |
| High                                                                                | -0.04 (-0.07, -0.003)               | 0.03   | 78.0 | Ref    | -0.05 (-0.09, -0.01)                  | 0.004  | 76.6 | Ref    | -0.05 (-0.09, -0.01)                                 | 0.01   | 76.7 | Ref    |
| <u>Smoking cessation counseling</u>                                                 |                                     |        |      |        |                                       |        |      |        |                                                      |        |      |        |
| Low                                                                                 | 0.52 (0.05, 0.99)                   | 0.03   | 89.9 | <0.001 | 0.42 (-0.05, 0.89)                    | 0.08   | 91.2 | <0.001 | 0.41 (-0.006, 0.88)                                  | 0.09   | 91.4 | <0.001 |
| Medium                                                                              | 0.13 (0.08, 0.18)                   | <0.001 | 95.5 | <0.001 | 0.11 (0.05, 0.16)                     | <0.001 | 95.6 | 0.03   | 0.10 (0.05, 0.16)                                    | <0.001 | 95.9 | 0.09   |
| High                                                                                | 0.003 (-0.01, 0.02)                 | 0.64   | 97.0 | Ref    | -0.002 (-0.02, 0.01)                  | 0.82   | 96.7 | Ref    | -0.007 (-0.02, 0.01)                                 | 0.44   | 96.6 | Ref    |

ACE=angiotensin converting enzyme; ARB=angiotensin receptor blocker. The adjusted model accounts for the presence of a cardiac intensive care unit, hospital ownership, teaching status, hospital system membership, proportion of patients with Medicare in the overall hospital population, proportion of patients with Medicaid in the overall hospital population, urban location, and region).

Table 2b: The relationship between case volume and outcomes and costs of care for heart failure, stratified by volume group (spline knots at 100 and 400 discharges in 2006-2007)

| Volume group               | Unadjusted analysis                  |        |         |        | Adjusted for hospital characteristics |        |         |        | Adjusted for hospital characteristics, hospital size |        |         |        |
|----------------------------|--------------------------------------|--------|---------|--------|---------------------------------------|--------|---------|--------|------------------------------------------------------|--------|---------|--------|
|                            | Change per 10 pt increase in volume* | P      | Mean    | P      | Change per 10 pt increase in volume*  | P      | Mean    | P      | Change per 10 pt increase in volume*                 | P      | Mean    | P      |
| <u>30-day mortality</u>    |                                      |        |         |        |                                       |        |         |        |                                                      |        |         |        |
| Low                        | -0.01<br>(-0.02, -0.002)             | 0.01   | 10.9%   | <0.001 | -0.01<br>(-0.02, -0.002)              | 0.01   | 10.6%   | <0.001 | -0.01<br>(-0.02, -0.002)                             | 0.02   | 10.5%   | <0.001 |
| Medium                     | -0.007<br>(-0.008, -0.006)           | <0.001 | 9.6%    | <0.001 | -0.006<br>(-0.008, -0.005)            | <0.001 | 9.5%    | <0.001 | -0.006<br>(-0.008, -0.005)                           | <0.001 | 9.4%    | <0.001 |
| High                       | -0.0007<br>(-0.001, -0.0003)         | <0.001 | 8.5%    | Ref    | -0.0006<br>(-0.0009, -0.0002)         | 0.002  | 8.6%    | Ref    | -0.0007<br>(-0.001, -0.0002)                         | 0.003  | 8.6%    | Ref    |
| <u>30-day readmission</u>  |                                      |        |         |        |                                       |        |         |        |                                                      |        |         |        |
| Low                        | -0.02<br>(-0.03, -0.01)              | <0.001 | 28.9%   | <0.001 | -0.01<br>(-0.02, -0.004)              | 0.002  | 26.7%   | 0.02   | -0.01<br>(-0.02, -0.005)                             | 0.002  | 26.6%   | 0.06   |
| Medium                     | -0.003<br>(-0.004, -0.002)           | <0.001 | 26.3%   | <0.001 | -0.0002<br>(-0.001, 0.001)            | 0.78   | 25.9%   | 0.76   | 0.00<br>(-0.001, 0.001)                              | 0.93   | 25.8%   | 0.81   |
| High                       | 0.0002<br>(-0.0001, 0.0004)          | 0.27   | 25.5%   | Ref    | -0.00<br>(-0.0004, 0.0003)            | 0.67   | 25.8%   | Ref    | 0.0001<br>(-0.0003, 0.0005)                          | 0.60   | 25.8%   | Ref    |
| <u>Costs per discharge</u> |                                      |        |         |        |                                       |        |         |        |                                                      |        |         |        |
| Low                        | \$3.61<br>(-67.72, 74.93)            | 0.92   | \$7,083 | <0.001 | \$37.04<br>(-35.27, 109.36)           | 0.32   | \$7,162 | <0.001 | \$33.93<br>(-38.35, 106.22)                          | 0.36   | \$7,476 | <0.001 |
| Medium                     | \$32.81<br>(25.93, 39.69)            | <0.001 | \$7,448 | <0.001 | \$28.69<br>(21.60, 35.79)             | <0.001 | \$7,587 | <0.001 | \$22.75<br>(15.25, 30.26)                            | <0.001 | \$7,811 | <0.001 |
| High                       | \$10.36<br>(6.98, 13.73)             | <0.001 | \$8,379 | Ref    | \$8.62<br>(5.24, 12.01)               | <0.001 | \$8,316 | Ref    | \$3.22<br>(-1.34, 7.77)                              | 0.17   | \$8,264 | Ref    |

\*For 30-day mortality and readmissions, change represents the change in the log odds of mortality (or readmissions) per 10 patient increase in case volume. For costs per discharge, change represents the change in dollars per discharge, per 10 patient increase in case volume. Adjusted analyses include the presence of a cardiac intensive care unit, hospital ownership, teaching status, hospital system membership, proportion of

patients with Medicare in the overall hospital population, proportion of patients with Medicaid in the overall hospital population, urban location, and region.

Appendix Table 3: The relationship between case volume and processes and outcomes of care, stratified by volume group

Appendix Table 3a: The relationship between case volume and processes of care for heart failure, stratified by volume group (spline knots at 200 and 400 discharges in 2006-2007)

| Volume group                                                                        | N hospitals | Unadjusted analysis                 |        |      |        | Adjusted for hospital characteristics, hospital size |        |      |        |
|-------------------------------------------------------------------------------------|-------------|-------------------------------------|--------|------|--------|------------------------------------------------------|--------|------|--------|
|                                                                                     |             | Change per 10 pt increase in volume | P      | Mean | P      | Change per 10 pt increase in volume                  | P      | Mean | P      |
| <u>Overall Score</u>                                                                |             |                                     |        |      |        |                                                      |        |      |        |
| Low                                                                                 | 1,388       | 0.75 (0.64, 0.87)                   | <0.001 | 80.2 | <0.001 | 0.57 (0.45, 0.68)                                    | <0.001 | 82.4 | <0.001 |
| Medium                                                                              | 964         | 0.13 (0.06, 0.20)                   | <0.001 | 87.0 | <0.001 | 0.02 (-0.05, 0.10)                                   | 0.50   | 86.6 | 0.90   |
| High                                                                                | 991         | -0.00 (-0.02, 0.02)                 | 0.84   | 89.1 | Ref    | -0.03 (-0.06, 0.00)                                  | 0.02   | 86.6 | Ref    |
| <u>ACE inhibitor or ARB for patients with left ventricular systolic dysfunction</u> |             |                                     |        |      |        |                                                      |        |      |        |
| Low                                                                                 | 378         | -0.19 (-0.33, -0.06)                | 0.005  | 89.3 | 0.12   | -0.12 (-0.26, 0.01)                                  | 0.08   | 89.5 | 0.79   |
| Medium                                                                              | 866         | 0.08 (0.02, 0.14)                   | 0.004  | 89.0 | 0.004  | 0.03 (-0.03, 0.09)                                   | 0.33   | 89.4 | 0.52   |
| High                                                                                | 989         | -0.00 (-0.02, 0.02)                 | 0.98   | 90.1 | Ref    | -0.02 (-0.04, 0.00)                                  | 0.02   | 89.6 | Ref    |
| <u>Assessment of left ventricular function</u>                                      |             |                                     |        |      |        |                                                      |        |      |        |
| Low                                                                                 | 1,388       | 0.80 (0.69, 0.91)                   | <0.001 | 86.1 | <0.001 | 0.58 (0.47, 0.68)                                    | <0.001 | 88.8 | <0.001 |
| Medium                                                                              | 964         | 0.16 (0.09, 0.22)                   | <0.001 | 93.6 | <0.001 | 0.02 (-0.05, 0.09)                                   | 0.54   | 92.9 | 0.64   |
| High                                                                                | 991         | 0.01 (-0.00, 0.03)                  | 0.23   | 96.3 | Ref    | -0.02 (-0.04, 0.00)                                  | 0.11   | 93.2 | Ref    |
| <u>Discharge instructions</u>                                                       |             |                                     |        |      |        |                                                      |        |      |        |
| Low                                                                                 | 1,161       | 0.69 (0.49, 0.89)                   | <0.001 | 70.9 | <0.001 | 0.55 (0.34, 0.75)                                    | <0.001 | 72.2 | <0.001 |
| Medium                                                                              | 964         | 0.12 (0.00, 0.23)                   | 0.04   | 76.6 | 0.13   | 0.06 (-0.06, 0.18)                                   | 0.31   | 76.5 | 0.75   |
| High                                                                                | 991         | -0.02 (-0.06, 0.01)                 | 0.17   | 78.0 | Ref    | -0.04 (-0.08, -0.00)                                 | 0.06   | 76.8 | Ref    |
| <u>Smoking cessation counseling</u>                                                 |             |                                     |        |      |        |                                                      |        |      |        |
| Low                                                                                 | 168         | 0.33 (0.18, 0.48)                   | <0.001 | 92.3 | <0.001 | 0.27 (0.12, 0.42)                                    | <0.001 | 93.3 | <0.001 |

|        |     |                    |       |      |       |                     |      |      |      |
|--------|-----|--------------------|-------|------|-------|---------------------|------|------|------|
| Medium | 510 | 0.10 (0.03, 0.15)  | 0.003 | 95.8 | 0.004 | 0.07 (0.00, 0.13)   | 0.04 | 96.2 | 0.29 |
| High   | 889 | 0.01 (-0.01, 0.02) | 0.45  | 97.0 | Ref   | -0.00 (-0.02, 0.01) | 0.58 | 96.6 | Ref  |

ACE=angiotensin converting enzyme; ARB=angiotensin receptor blocker. The adjusted model accounts for the presence of a cardiac intensive care unit, hospital ownership, teaching status, hospital system membership, proportion of patients with Medicare in the overall hospital population, proportion of patients with Medicaid in the overall hospital population, urban location, and region).



Appendix Table 3b: The relationship between case volume and outcomes and costs of care for heart failure, stratified by volume group (spline knots at 200 and 400 discharges in 2006-2007)

| Volume group               | Number of patients | Number of hospitals | Unadjusted analysis                  |        |         |        | Adjusted for hospital characteristics, hospital size |        |         |        |
|----------------------------|--------------------|---------------------|--------------------------------------|--------|---------|--------|------------------------------------------------------|--------|---------|--------|
|                            |                    |                     | Change per 10 pt increase in volume* | P      | Mean    | P      | Change per 10 pt increase in volume*                 | P      | Mean    | P      |
| <u>30-day mortality</u>    |                    |                     |                                      |        |         |        |                                                      |        |         |        |
| Low                        | 176,985            | 2,129               | -0.009<br>(-0.012, -0.007)           | <0.001 | 10.5%   | <0.001 | -0.009<br>(-0.01, -0.006)                            | <0.001 | 10.2%   | <0.001 |
| Medium                     | 248,251            | 970                 | -0.006<br>(-0.007, -0.004)           | <0.001 | 9.3%    | <0.001 | -0.006<br>(-0.007, -0.004)                           | <0.001 | 9.2%    | <0.001 |
| High                       | 604,265            | 992                 | -0.0008<br>(-0.001, -0.0004)         | <0.001 | 8.5%    | Ref    | -0.0008<br>(-0.001, -0.0003)                         | 0.001  | 8.6%    | Ref    |
| <u>30-day readmission</u>  |                    |                     |                                      |        |         |        |                                                      |        |         |        |
| Low                        | 146,671            | 2,133               | -0.009<br>(-0.01, -0.006)            | <0.001 | 27.7%   | <0.001 | -0.003<br>(-0.006, 0.0005)                           | 0.10   | 25.9%   | 0.76   |
| Medium                     | 214,024            | 970                 | -0.003<br>(-0.004, -0.0009)          | 0.002  | 26.0%   | <0.001 | 0.00<br>(-0.002, 0.002)                              | 0.92   | 25.8%   | 0.88   |
| High                       | 545,405            | 992                 | 0.0001<br>(-0.0002, 0.0004)          | 0.40   | 25.5%   | Ref    | 0.0001<br>(-0.0003, 0.0005)                          | 0.59   | 25.8%   | Ref    |
| <u>Costs per discharge</u> |                    |                     |                                      |        |         |        |                                                      |        |         |        |
| Low                        | 125,300            | 1,181               | \$21.78<br>(1.92, 41.61)             | 0.03   | \$7,189 | <0.001 | \$24.52<br>(4.24, 44.80)                             | 0.02   | \$7,609 | <0.001 |
| Medium                     | 253,205            | 956                 | \$35.76<br>(24.94, 46.59)            | <0.001 | \$7,579 | <0.001 | \$22.87<br>(11.90, 33.82)                            | <0.001 | \$7,882 | <0.001 |
| High                       | 621,913            | 987                 | \$10.13<br>(6.67, 13.59)             | <0.001 | \$8,382 | Ref    | \$3.19<br>(-1.44, 7.81)                              | 0.18   | \$8,268 | Ref    |

\*For 30-day mortality and readmissions, change represents the change in the log odds of mortality (or readmissions) per 10 patient increase in case volume. For costs per discharge, change represents the change in dollars per discharge, per 10 patient increase in case volume. Adjusted analyses include the presence of a cardiac intensive care unit, hospital ownership, teaching status, hospital system membership, proportion of patients with Medicare in the overall hospital population, proportion of patients with Medicaid in the overall hospital population, urban location, and region.

**References (numbers refer to order cited in main text):**

17. Elixhauser A, Steiner C, Harris DR, Coffey RM. Comorbidity measures for use with administrative data. *Med Care*. 1998;36(1):8-27.
18. Southern DA, Quan H, Ghali WA. Comparison of the Elixhauser and Charlson/Deyo methods of comorbidity measurement in administrative data. *Med Care*. 2004;42(4):355-360.
19. Li B, Evans D, Faris P, Dean S, Quan H. Risk adjustment performance of Charlson and Elixhauser comorbidities in ICD-9 and ICD-10 administrative databases. *BMC Health Serv Res*. 2008;8:12.
40. Ross JS, Mulvey GK, Stauffer B, et al. Statistical models and patient predictors of readmission for heart failure: a systematic review. *Archives of internal medicine*. 2008;168(13):1371-1386.
15. Desai MM, Lin Z, Schreiner GC, et al. (Yale-New Haven Health Services Corporation / Center for Outcomes Research and Evaluation (YNHHSC/CORE)). 2009 Measures Maintenance Technical Report: Acute Myocardial Infarction, Heart Failure, and Pneumonia 30-Day Risk Standardized Readmission Measures. 2009
3. Krumholz HM, Merrill AR, Schone EM, et al. Patterns of hospital performance in acute myocardial infarction and heart failure 30-day mortality and readmission. *Circ Cardiovasc Qual Outcomes*. 2009;2(5):407-413.
